# Supplementary material
Source: HighWire-hosted journal article supplement (http://dmd.aspetjournals.org/highwire/filestream/73438/field_highwire_adjunct_files/0/86546SupplFigure.pdf)
Supplement: 86546SupplFigure.pdf [file 86546SupplFigure.pdf]

## Supplemental data

Title: Identification of Novel Metabolites of Vildagliptin in Rats: Thiazoline-Containing Thiol Adducts Formed via Cysteine or GSH Conjugation

Authors: Katsuhiko Mizuno, Kenji Takeuchi, Ken Umehara, Miki Nakajima

Journal Title: Drug Metabolism and Disposition (MS ID#: DMD/2019/086546)

### Plasma 1 h post-dosing

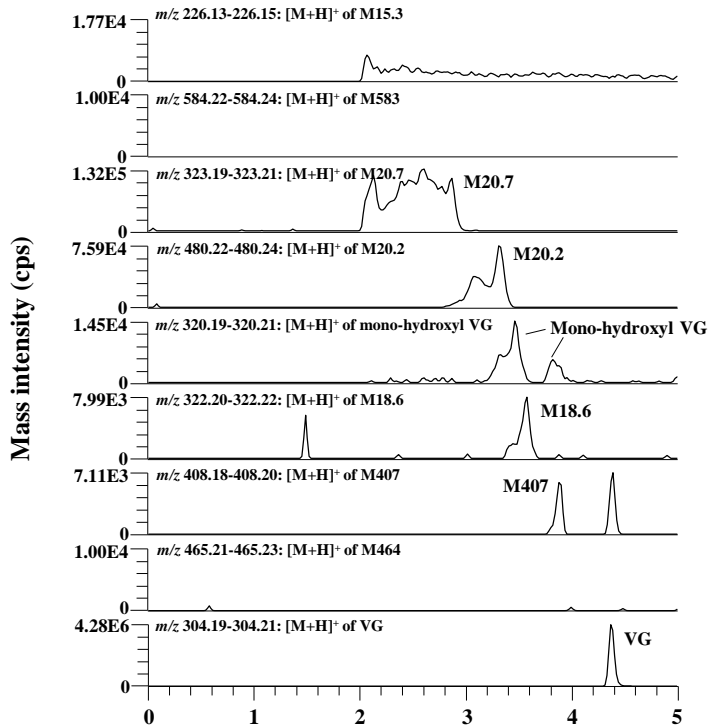

### Urine 0–24 h post-dosing

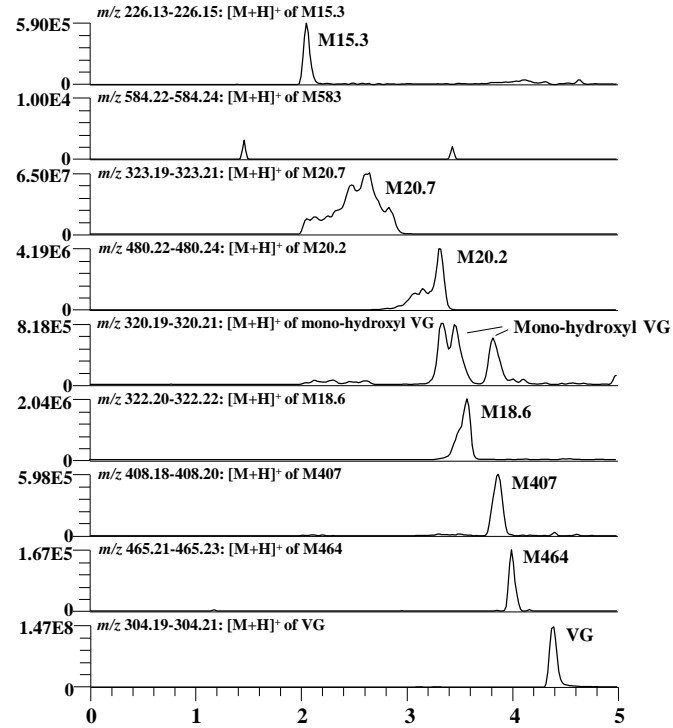

### Feces 0–24 h post-dosing

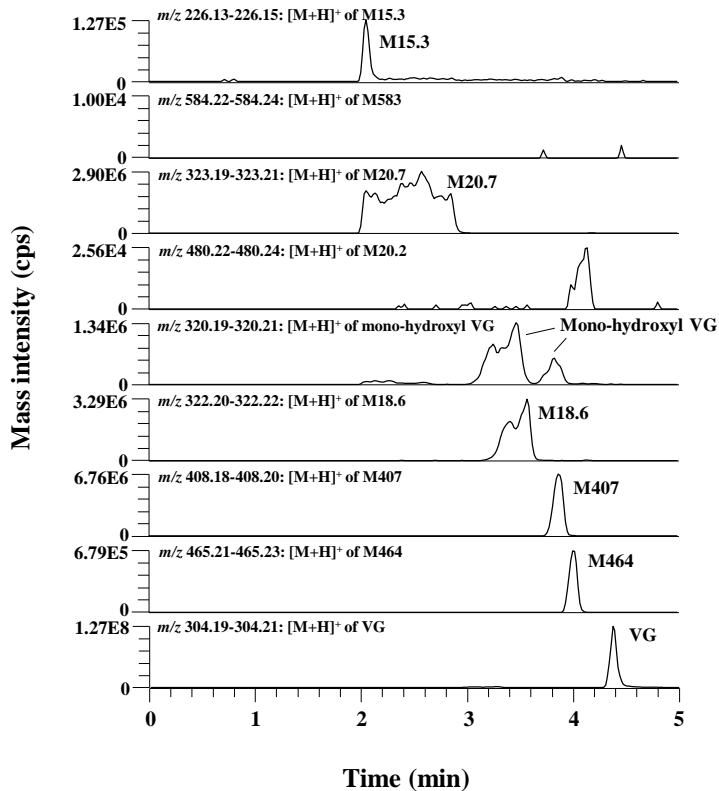

### Bile 0–4 h post-dosing

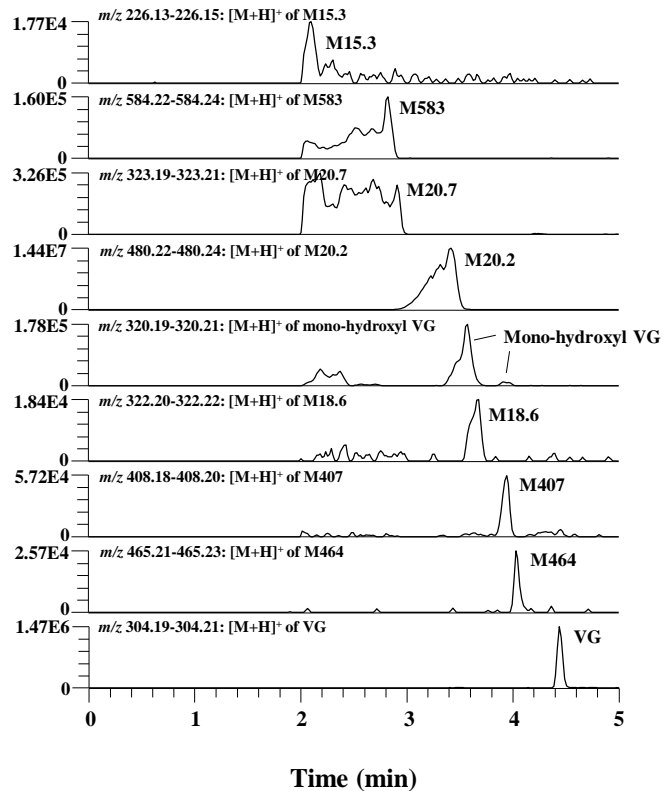

Supplementary Figure 1. Typical ion chromatograms obtained from rat plasma, urine, feces, and bile following a single oral dose of VG. The plasma, urinary, or fecal homogenate samples collected from three Sprague-Dawley rats or biliary samples from bile duct-cannulated rats were pooled and analyzed by high-resolution LC-MS in positive ion mode.
